# Supplementary material
Source: PubMed Central journal article supplement (PMC4622858)

# Supplemental Figure 2

## alpha N263

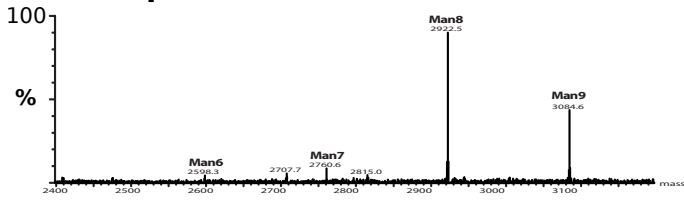

## alpha N459

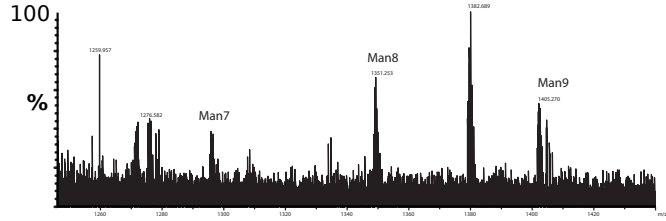

## SC N65/72

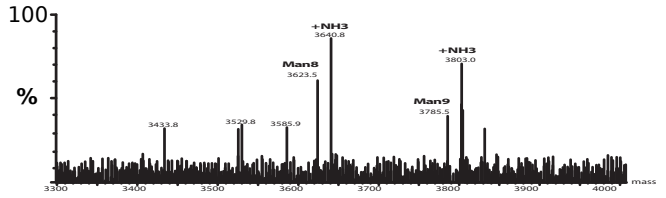

## SC N117

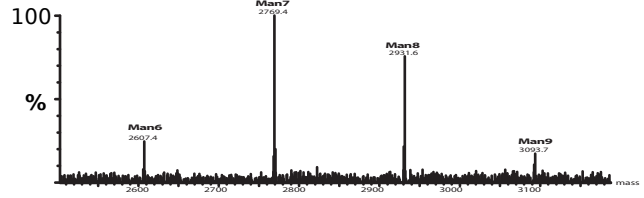

## SC N403

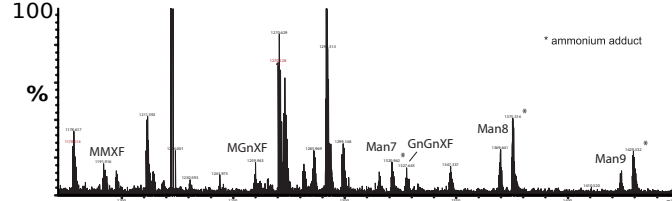

## SC N451

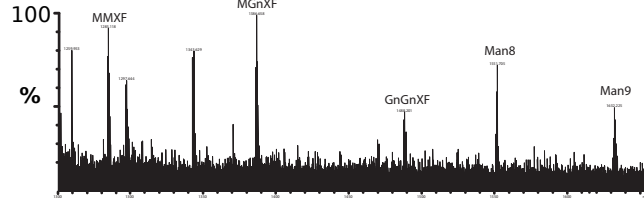

## SC N481

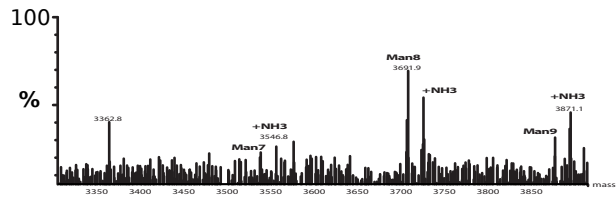

## J N71

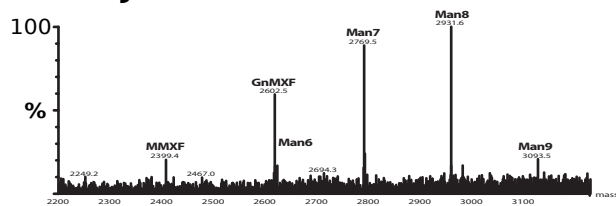

Supplement: kmab-06-06-976423-s001.pdf [file kmab-06-06-976423-s001.pdf]

# Supplemental Figure 1

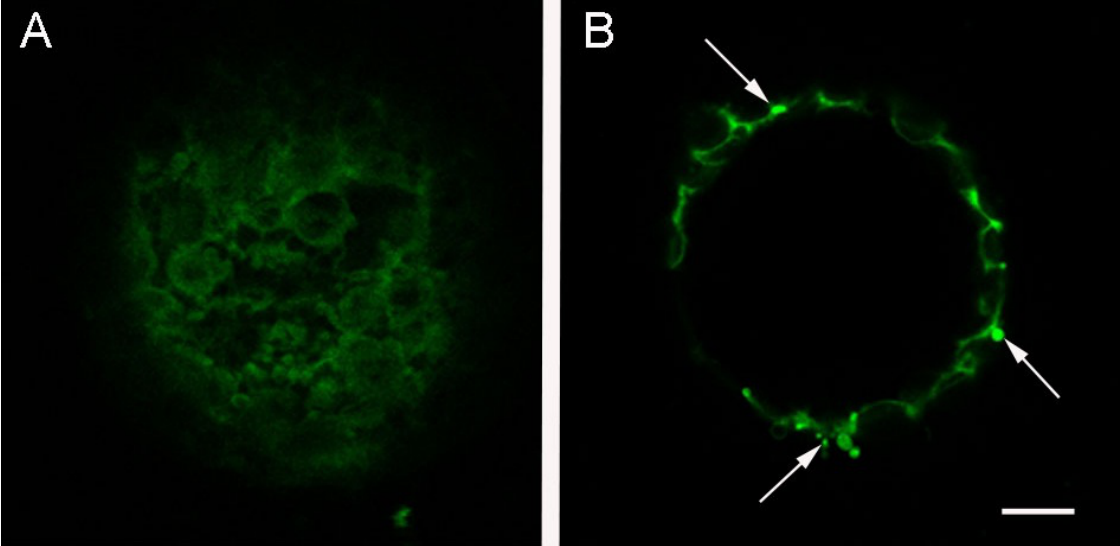

Supplement: kmab-06-06-976423-s002.pdf [file kmab-06-06-976423-s002.pdf]
